# Supplementary material for: Strengthened phonon scattering and band convergence synergistically realize the high-performance SnTe thermoelectric
Source: Royal Society of Chemistry journal article supplement (doi:10.1039/d2ta08600j), 2022-12-01
Supplement: d2ta08600j1.pdf [file d2ta08600j1.pdf]

Supporting Information

## Strengthened Phonon Scattering and Band Convergence

### Synergistically Realize High-Performance SnTe Thermoelectric

Gang Wu<sup>1,2</sup>, Zhe Guo<sup>1,2</sup>, Xiaojian Tan<sup>1,2,\*</sup>, Ruoyu Wang<sup>1,2</sup>, Qiang Zhang<sup>1,2</sup>, Haoyang Hu<sup>1</sup>, Peng Sun<sup>1,2</sup>, Jiehua Wu<sup>1</sup>, Guo-Qiang Liu<sup>1,2</sup>, Jun Jiang<sup>1,2,\*</sup>

<sup>1</sup> Ningbo Institute of Materials Technology and Engineering, Chinese Academy of Sciences, Ningbo 315201, China.

<sup>2</sup> University of Chinese Academy of Science, Beijing 100049, China.

Email: [tanxiaojian@nimte.ac.cn](mailto:tanxiaojian@nimte.ac.cn), [jjun@nimte.ac.cn](mailto:jjun@nimte.ac.cn)

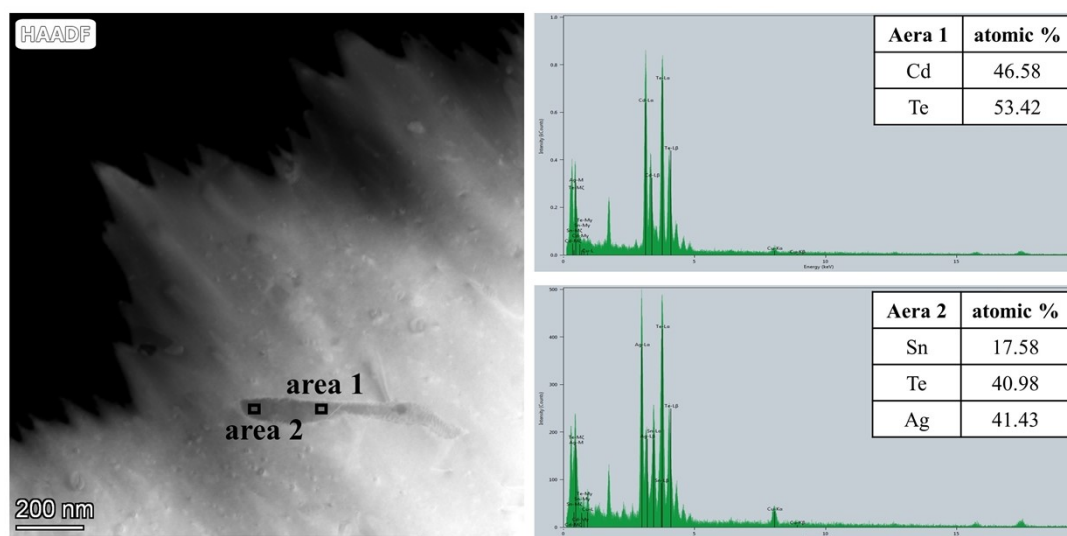

**Figure S1.** The HAADF image and its elements composition results of area 1 and area 2.

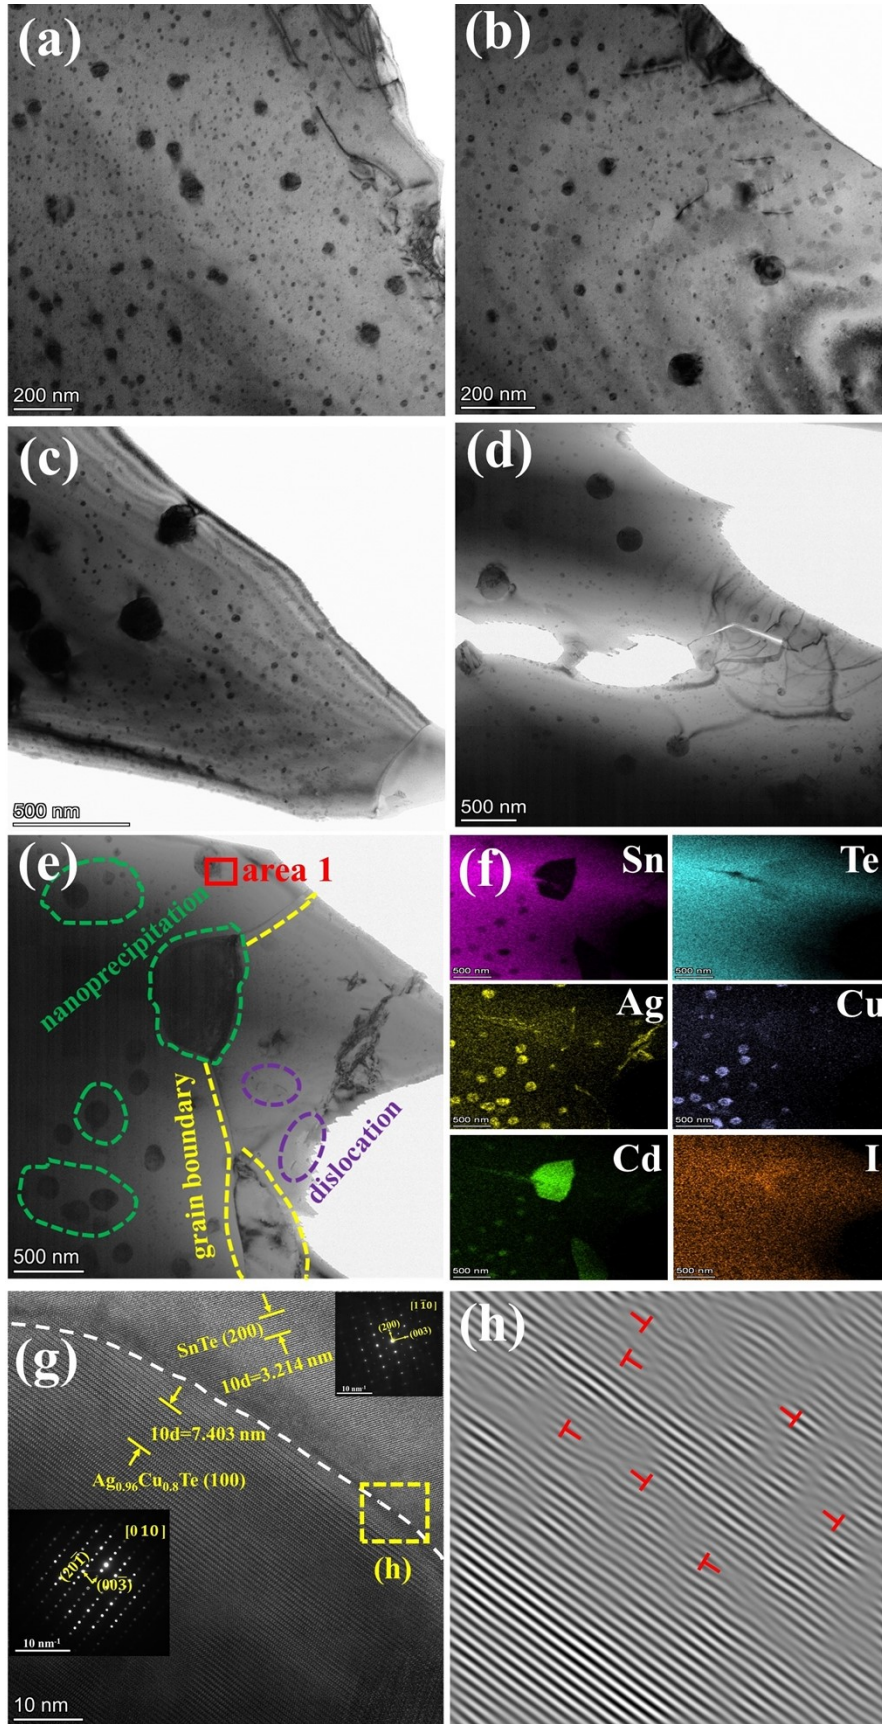

**Figure S2.** TEM analyses of the  $(\text{Sn}_{0.96}\text{Cd}_{0.04}\text{Te}_{0.99}\text{I}_{0.01})_{0.94}(\text{AgCuTe})_{0.06}$  sample: (a-e) The medium magnification TEM image to show the grain boundaries, dislocations and

nanoprecipitates defects, (f) its corresponding EDS mapping of Sn, Te, Ag, Cu, Cd, I; (g) The high-resolution TEM image from selected area “1” in (e) near the nanoprecipitate and the inset is the selected area electron diffraction (SAED) pattern along the  $[1\bar{1}0]$  direction of SnTe and the  $[010]$  direction of  $\text{Ag}_{0.96}\text{Cu}_{0.8}\text{Te}$ , (h) the IFFT image from the selected area in (g) to display the dislocations distribution.

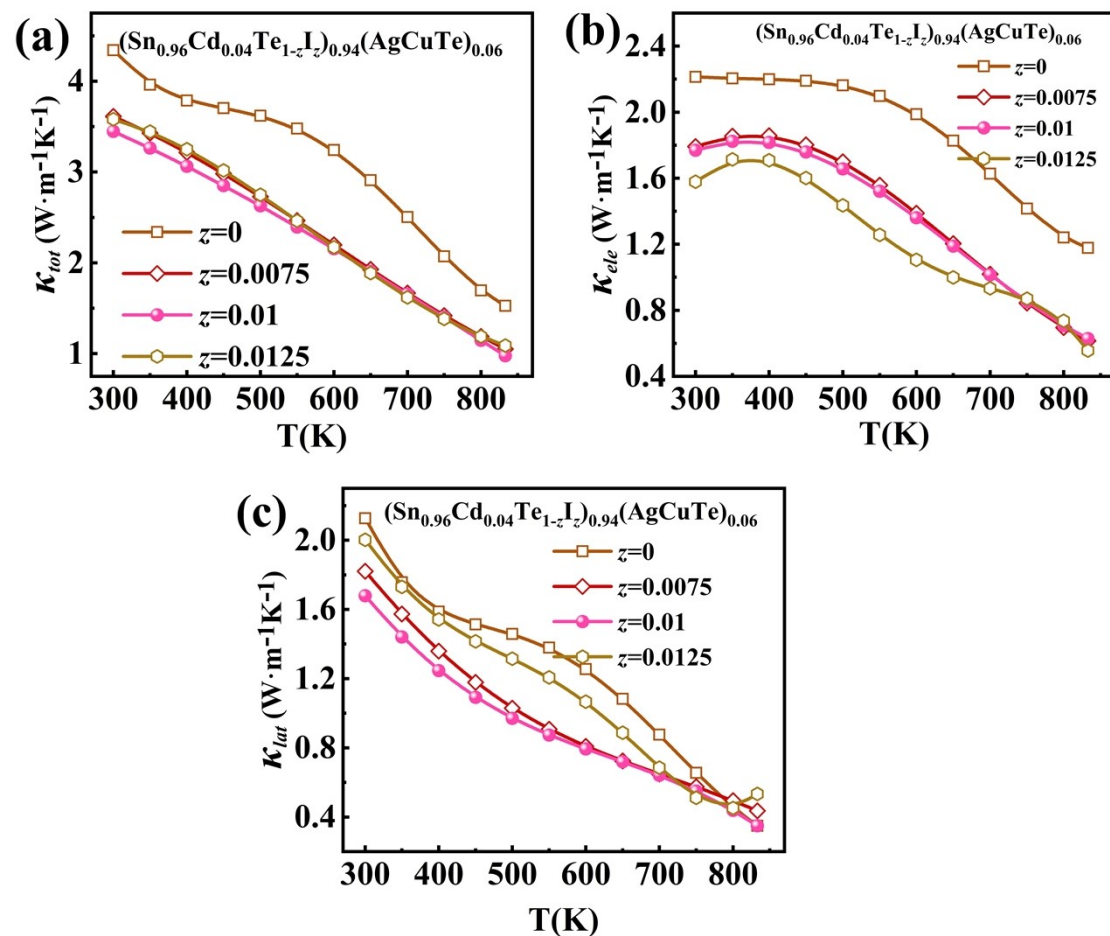

**Figure S3.** The temperature dependent thermal transport properties of  $(\text{Sn}_{0.96}\text{Cd}_{0.04}\text{Te}_{1-z}\text{I}_z)_{0.94}(\text{AgCuTe})_{0.06}$  samples ( $z = 0, 0.0075, 0.01, 0.0125$ ): (a) total thermal conductivity  $\kappa_{tot}$ , (b) electrical thermal conductivity  $\kappa_{ele}$ , (c) lattice thermal conductivity  $\kappa_{lat}$ .
